# Supplementary material for: The First Pilot Epigenetic Type Improvement of Neuropsychiatric Symptoms in a Polymorphic Dopamine D2 (-DRD2/ANKK (Taq1A)), OPRM1 (A/G), DRD3 (C/T), and MAOA (4R) Compromised Preadolescence Male with Putative PANDAS/CANS: Positive Clinical Outcome with Precision-Guided DNA Testing and Pro-Dopamine Regulation (KB220) and Antibacterial Therapies
Source: PubMed Central journal article supplement (PMC11539193; doi:10.4236/oji.2024.143006), 2024-09
Supplement: NIHMS2026239-supplement-1.pdf [file NIHMS2026239-supplement-1.pdf]

## Supplemental Figures

Accession #: [REDACTED] Client Info: [REDACTED]  
 Lab: [REDACTED]  
 Patient: [REDACTED]  
 Pat. Chart No.: [REDACTED]  
 Ordering Phys: [REDACTED]

Lab Order No.: [REDACTED] Collected: [REDACTED]  
 Print Date: [REDACTED] Received: [REDACTED]  
 Report Status: [REDACTED] Reported: [REDACTED]

| Test Name                                                 | Flag | Result Value (Unit)     | Reference Range | Lab |
|-----------------------------------------------------------|------|-------------------------|-----------------|-----|
| <b>CBC (INCLUDES DIFF/PLT)</b>                            |      |                         |                 |     |
| WHITE BLOOD CELL COUNT                                    |      | 6.8 (Thousand/uL)       | 4.5-13.5        | NL1 |
| RED BLOOD CELL COUNT                                      |      | 5.09 (Million/uL)       | 4.00-5.20       | NL1 |
| HEMOGLOBIN                                                |      | 13.6 (g/dL)             | 11.5-15.5       | NL1 |
| HEMATOCRIT                                                |      | 40.2 (%)                | 35.0-45.0       | NL1 |
| MCV                                                       |      | 79.0 (fL)               | 77.0-95.0       | NL1 |
| MCH                                                       |      | 26.7 (pg)               | 25.0-33.0       | NL1 |
| MCHC                                                      |      | 33.8 (g/dL)             | 31.0-36.0       | NL1 |
| RDW                                                       |      | 13.1 (%)                | 11.0-15.0       | NL1 |
| PLATELET COUNT                                            |      | 267 (Thousand/uL)       | 140-400         | NL1 |
| MPV                                                       |      | 11.1 (fL)               | 7.5-12.5        | NL1 |
| ABSOLUTE NEUTROPHILS                                      |      | 4277 (cells/uL)         | 1500-8000       | NL1 |
| ABSOLUTE LYMPHOCYTES                                      |      | 1822 (cells/uL)         | 1500-6500       | NL1 |
| ABSOLUTE MONOCYTES                                        |      | 571 (cells/uL)          | 200-900         | NL1 |
| ABSOLUTE EOSINOPHILS                                      |      | 82 (cells/uL)           | 15-500          | NL1 |
| ABSOLUTE BASOPHILS                                        |      | 48 (cells/uL)           | 0-200           | NL1 |
| NEUTROPHILS                                               |      | 62.9 (%)                |                 | NL1 |
| LYMPHOCYTES                                               |      | 26.8 (%)                |                 | NL1 |
| MONOCYTES                                                 |      | 8.4 (%)                 |                 | NL1 |
| EOSINOPHILS                                               |      | 1.2 (%)                 |                 | NL1 |
| BASOPHILS                                                 |      | 0.7 (%)                 |                 | NL1 |
| <b>Comprehensive Metabolic Panel</b>                      |      |                         |                 |     |
| Glucose                                                   |      | 89 (mg/dL)              | 65-99           | NL1 |
| Note: Fasting reference interval                          |      |                         |                 |     |
| Urea Nitrogen (bun)                                       |      | 13 (mg/dL)              | 7-20            | NL1 |
| Creatinine                                                |      | 0.47 (mg/dL)            | 0.30-0.78       | NL1 |
| Note: Patient is <18 years old. Unable to calculate eGFR. |      |                         |                 |     |
| Bun/creatinine Ratio                                      |      | NOT APPLICABLE ((calc)) | 6-22            | NL1 |
| Sodium                                                    |      | 139 (mmol/L)            | 135-146         | NL1 |
| Potassium                                                 |      | 4.0 (mmol/L)            | 3.8-5.1         | NL1 |
| Chloride                                                  |      | 103 (mmol/L)            | 98-110          | NL1 |
| Carbon Dioxide                                            |      | 25 (mmol/L)             | 20-32           | NL1 |
| Calcium                                                   |      | 10.0 (mg/dL)            | 8.9-10.4        | NL1 |
| Protein, Total                                            |      | 7.0 (g/dL)              | 6.3-8.2         | NL1 |
| Albumin                                                   |      | 4.6 (g/dL)              | 3.6-5.1         | NL1 |
| Globulin                                                  |      | 2.4 (g/dL (calc))       | 2.1-3.5         | NL1 |
| Albumin/globulin Ratio                                    |      | 1.9 ((calc))            | 1.0-2.5         | NL1 |
| Bilirubin, Total                                          |      | 0.4 (mg/dL)             | 0.2-1.1         | NL1 |
| Alkaline Phosphatase                                      |      | 244 (U/L)               | 123-426         | NL1 |
| Ast                                                       |      | 24 (U/L)                | 12-32           | NL1 |

Page 1 continued on 2

Accession #: [REDACTED] Client Info: [REDACTED]  
 Lab: [REDACTED]  
 Patient: [REDACTED]  
 Pat. Chart No.: [REDACTED]  
 Ordering Phys: [REDACTED]

|                                                                                                                                                                                                                                                                                                                                                                                                                                                                                                                                                                                                     |              |              |     |
|-----------------------------------------------------------------------------------------------------------------------------------------------------------------------------------------------------------------------------------------------------------------------------------------------------------------------------------------------------------------------------------------------------------------------------------------------------------------------------------------------------------------------------------------------------------------------------------------------------|--------------|--------------|-----|
| Alt                                                                                                                                                                                                                                                                                                                                                                                                                                                                                                                                                                                                 | 20 (U/L)     | 8-30         | NL1 |
| <b>ANTI-STREPTOLYSIN O</b>                                                                                                                                                                                                                                                                                                                                                                                                                                                                                                                                                                          |              |              |     |
| ANTI-STREPTOLYSIN O                                                                                                                                                                                                                                                                                                                                                                                                                                                                                                                                                                                 | <50 (IU/mL)  | <250         | NL1 |
| <b>MYCOPLASMA PNEUMONIAE ANTIBODIES (IGG, IGM)</b>                                                                                                                                                                                                                                                                                                                                                                                                                                                                                                                                                  |              |              |     |
| Mycoplasma Pneumoniae Antibody (igg)                                                                                                                                                                                                                                                                                                                                                                                                                                                                                                                                                                | H 1.71       | <=0.90       | AMD |
| <b>Note:</b>                                                                                                                                                                                                                                                                                                                                                                                                                                                                                                                                                                                        |              |              |     |
| Reference Range:                                                                                                                                                                                                                                                                                                                                                                                                                                                                                                                                                                                    |              |              |     |
|                                                                                                                                                                                                                                                                                                                                                                                                                                                                                                                                                                                                     | <=0.90       | Negative     |     |
|                                                                                                                                                                                                                                                                                                                                                                                                                                                                                                                                                                                                     | 0.91-1.09    | Equivocal    |     |
|                                                                                                                                                                                                                                                                                                                                                                                                                                                                                                                                                                                                     | >1.10        | Positive     |     |
| A positive IgG result indicates that the patient has antibody to Mycoplasma. It does not differentiate between an active or past infection. The clinical diagnosis must be interpreted in conjunction with the clinical signs and symptoms of the patient.                                                                                                                                                                                                                                                                                                                                          |              |              |     |
| Mycoplasma Pneumoniae Antibody (igm)                                                                                                                                                                                                                                                                                                                                                                                                                                                                                                                                                                | 671 (U/mL)   | <770         | AMD |
| <b>Note:</b>                                                                                                                                                                                                                                                                                                                                                                                                                                                                                                                                                                                        |              |              |     |
| Reference Range:                                                                                                                                                                                                                                                                                                                                                                                                                                                                                                                                                                                    |              |              |     |
|                                                                                                                                                                                                                                                                                                                                                                                                                                                                                                                                                                                                     | <770 U/ml    | Negative     |     |
|                                                                                                                                                                                                                                                                                                                                                                                                                                                                                                                                                                                                     | 770-950 U/mL | Low positive |     |
|                                                                                                                                                                                                                                                                                                                                                                                                                                                                                                                                                                                                     | >950 U/mL    | Positive     |     |
| A positive IgM antibody result is consistent with recent infection. However, a negative result does not necessarily rule out recent infection as some individuals may not mount another IgM response, if previously infected.                                                                                                                                                                                                                                                                                                                                                                       |              |              |     |
| A positive IgM antibody result with or without a positive IgG antibody result, is consistent with recent infection. However, a negative result does not necessarily rule out recent infection as some individuals may not mount another IgM response, if previously infected. A positive IgG antibody result in the absence of a positive IgM antibody result, indicates that the patient has antibody to Mycoplasma. It does not differentiate between an active or past infection. The clinical diagnosis must be interpreted in conjunction with the clinical signs and symptoms of the patient. |              |              |     |
| <b>DNASE B ANTIBODY</b>                                                                                                                                                                                                                                                                                                                                                                                                                                                                                                                                                                             |              |              |     |
| DNASE B ANTIBODY                                                                                                                                                                                                                                                                                                                                                                                                                                                                                                                                                                                    | H 622 (U/mL) | <376         | SLI |
| <b>HOMOCYSTEINE</b>                                                                                                                                                                                                                                                                                                                                                                                                                                                                                                                                                                                 |              |              |     |
| HOMOCYSTEINE                                                                                                                                                                                                                                                                                                                                                                                                                                                                                                                                                                                        | 5.3 (umol/L) | <11.4        | NL1 |
| <b>Note:</b> Homocysteine is increased by functional deficiency of folate or vitamin B12. Testing for methylmalonic acid differentiates between these deficiencies. Other causes of increased homocysteine include renal failure, folate antagonists such as methotrexate and phenytoin, and exposure to nitrous oxide.<br>Selhub J, et al., Ann Intern Med. 1999;131(5):331-9.                                                                                                                                                                                                                     |              |              |     |
| <b>TSH</b>                                                                                                                                                                                                                                                                                                                                                                                                                                                                                                                                                                                          |              |              |     |
| TSH                                                                                                                                                                                                                                                                                                                                                                                                                                                                                                                                                                                                 | 1.10 (mIU/L) | 0.50-4.30    | NL1 |
| <b>T3, FREE</b>                                                                                                                                                                                                                                                                                                                                                                                                                                                                                                                                                                                     |              |              |     |
| T3, FREE                                                                                                                                                                                                                                                                                                                                                                                                                                                                                                                                                                                            | 4.3 (pg/mL)  | 3.3-4.8      | NL1 |
| <b>T4, FREE</b>                                                                                                                                                                                                                                                                                                                                                                                                                                                                                                                                                                                     |              |              |     |
| T4, FREE                                                                                                                                                                                                                                                                                                                                                                                                                                                                                                                                                                                            | 1.0 (ng/dL)  | 0.9-1.4      | NL1 |

Accession #: [REDACTED] Client Info: [REDACTED]  
 Lab: [REDACTED]  
 Patient: [REDACTED]  
 Pat. Chart No.: [REDACTED] [REDACTED] [REDACTED] [REDACTED]  
 Ordering Phys: [REDACTED] [REDACTED]

**GAD65, IA-2, AND INSULIN AUTOANTIBODY**

Glutamic Acid Decarboxylase 65 Ab <5 (U/mL) <5 EZ  
**Note:** This test was performed using the GAD65 ELISA method which is standardized against the International reference preparation 97/550.  
 Ia-2 Antibody <5.4 (U/mL) <5.4 EZ  
**Note:** This test was performed using the IA-2 Antibody ELISA method which is standardized against the WHO Reference Reagent 97/550. The reference range reported was established specifically for this test method.  
 Insulin Autoantibody <0.4 (U/mL) <0.4 EZ

**C-REACTIVE PROTEIN**

C-REACTIVE PROTEIN 0.8 (mg/L) <8.0 NL1

**(CMV) CYTOMEGALOVIRUS ANTIBODIES (IGG, IGM)**

Cytomegalovirus Antibody (igg) <0.60 (U/mL) NL1  
**Note:**

|             |                |
|-------------|----------------|
| U/mL        | Interpretation |
| -----       | -----          |
| <0.60       | Negative       |
| 0.60-0.69   | Equivocal      |
| > or = 0.70 | Positive       |

A positive result indicates that the patient has antibody to CMV. It does not differentiate between an active or past infection.

Cytomegalovirus Antibody (igm) <30.00 (AU/mL) NL1  
**Note:**

|              |                      |
|--------------|----------------------|
| AU/mL        | Interpretation       |
| -----        | -----                |
| <30.00       | No Antibody Detected |
| 30.00-34.99  | Equivocal            |
| > or = 35.00 | Antibody Detected    |

Results from any one IgM assay should not be used as a sole determinant of a current or recent infection. Because an IgM test can yield false positive results and low level IgM antibody may persist for more than 12 months post infection, reliance on a single test result could be misleading. Acute infection is best diagnosed by demonstrating the conversion of IgG from negative to positive. If an acute infection is suspected, consider obtaining a new specimen and submit for both IgG and IgM testing in two or more weeks.

**EPSTEIN BARR VIRUS ANTIBODY PANEL**

EBV VIRAL CAPSID AG (VCA) <36.00 (U/mL) NL1  
**Note:**

|             |                |
|-------------|----------------|
| U/mL        | Interpretation |
| -----       | -----          |
| <36.00      | Negative       |
| 36.00-43.99 | Equivocal      |
| >43.99      | Positive       |

EBV VIRAL CAPSID AG (VCA) H 220.00 (U/mL) NL1  
**Note:**

|             |                |
|-------------|----------------|
| U/mL        | Interpretation |
| -----       | -----          |
| <18.00      | Negative       |
| 18.00-21.99 | Equivocal      |
| >21.99      | Positive       |

EBV NUCLEAR AG (EBNA) H >600.00 (U/mL) NL1  
**Note:**

|             |                |
|-------------|----------------|
| U/mL        | Interpretation |
| -----       | -----          |
| <18.00      | Negative       |
| 18.00-21.99 | Equivocal      |
| >21.99      | Positive       |

Accession #: [REDACTED] Client Info.: [REDACTED]  
 Lab: [REDACTED]  
 Patient: [REDACTED]  
 Pat. Chart No.: [REDACTED] [REDACTED] [REDACTED] [REDACTED]  
 Ordering Phys: [REDACTED] [REDACTED] [REDACTED]

INTERPRETATION: NL1

**Note:**  
 Suggestive of a past Epstein-Barr virus infection. In infants, a similar pattern may occur as a result of passive maternal transfer of antibody.

**HSV 1/2 IGG,TYPE SPECIFIC AB**

HSV 1 IGG, TYPE SPECIFIC <0.90 (index) NL1  
 HSV 2 IGG, TYPE SPECIFIC <0.90 (index) NL1

| <b>Note:</b> | Index     | Interpretation |
|--------------|-----------|----------------|
|              | -----     | -----          |
|              | <0.90     | Negative       |
|              | 0.90-1.09 | Equivocal      |
|              | >1.09     | Positive       |

This assay utilizes recombinant type-specific antigens to differentiate HSV-1 from HSV-2 infections. A positive result cannot distinguish between recent and past infection. If recent HSV infection is suspected but the results are negative or equivocal, the assay should be repeated in 4-6 weeks. The performance characteristics of the assay have not been established for pediatric populations, immunocompromised patients, or neonatal screening.

**HERPESVIRUS 6 ANTIBODIES (IGG,IGM)**

HERPESVIRUS 6 AB (IGG) H 1:10 (titer) TXC  
 HERPESVIRUS 6 AB (IGM) <1:20 (titer) TXC  
 INTERPRETATION PAST INFECTION TXC

**Note:**  
 REFERENCE RANGE:  
 IgG <1:10  
 IgM <1:20

Human Herpesvirus 6 (HHV-6) infects T-lymphocytes, and has been identified as an etiologic agent of exanthema subitum. Rises in antibody titers to HHV-6 have been detected during infection with other viruses. In seroepidemiology studies of the prevalence of exposure using serum screening dilutions of 1:10, the detection of IgG antibody in a mid-life population approaches 100%. Due to this high prevalence of HHV-6 antibody, correlations of single IgG titers with specific diseases are of little clinical value.

Evidence of acute infection or reactivation of HHV-6 is demonstrated by a significant rise or seroconversion of IgG and IgM titers.

This test was developed and its analytical performance characteristics have been determined by Quest Diagnostics Infectious Disease. It has not been cleared or approved by FDA. This assay has been validated pursuant to the CLIA regulations and is used for clinical purposes.

**VITAMIN B12**

VITAMIN B12 818 (pg/mL) 260-935 NL1

[REDACTED]

Page 4 continued on 5

Accession #: [REDACTED] Client Info: [REDACTED]  
Lab: [REDACTED]  
Patient: [REDACTED]  
Pat. Chart No.: [REDACTED]  
Ordering Phys: [REDACTED]

**VITAMIN D, 25-OH, TOTAL, IA**

VITAMIN D,25-OH,TOTAL,IA L 25 (ng/mL) 30-100 NL1

Note: Vitamin D Status 25-OH Vitamin D:

Deficiency: <20 ng/mL  
Insufficiency: 20 - 29 ng/mL  
Optimal: > or = 30 ng/mL

For 25-OH Vitamin D testing on patients on D2-supplementation and patients for whom quantitation of D2 and D3 fractions is required, the QuestAssureD(TM) 25-OH VIT D, (D2,D3), LC/MS/MS is recommended: order code 92888 (patients >2yrs). See Note 1

Note 1

For additional information, please refer to <http://education.QuestDiagnostics.com/faq/FAQ199> (This link is being provided for informational/educational purposes only.)

**Performing Laboratory Information:**

[REDACTED]  
[REDACTED]  
[REDACTED]  
[REDACTED]  
[REDACTED]

[REDACTED]

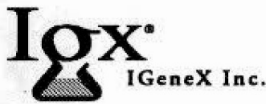

www.igenex.com

TO : [REDACTED]

Laboratory Director: [REDACTED]

REFERRING PHYSICIAN

[REDACTED]

[REDACTED]

Collected: [REDACTED]  
 Received: [REDACTED]  
 Reported: [REDACTED]  
 Reprinted: [REDACTED]  
 Amended: [REDACTED]  
 Corrected: [REDACTED]

| TEST | SPECIMEN | RESULT | REFERENCE RANGE | UNITS |
|------|----------|--------|-----------------|-------|
|------|----------|--------|-----------------|-------|

**BORRELIOSIS - Lyme Disease**

Lyme Western Blot IgM                      Serum  
 IGX Criteria:                                      Negative  
 CDC/NYS Criteria:                              Negative

| Band (kDa) | 18 | 23-25* | 28 | 30 | 31* | 34* | 39* | 41* | 45 | 58 | 66 | 83-93* |
|------------|----|--------|----|----|-----|-----|-----|-----|----|----|----|--------|
| Intensity  | -  | -      | -  | -  | -   | -   | -   | IND | -  | -  | -  | -      |

Band Intensity: Positive: + to +++++, Indeterminate: Ind, Negative: (-)

| INTERPRETATION       | IGX CRITERIA                                                                                                 | CDC/NYS CRITERIA                                                            |
|----------------------|--------------------------------------------------------------------------------------------------------------|-----------------------------------------------------------------------------|
| <b>Positive</b>      | 2 or more of the starred bands are present (+): 23-25*, 31*, 34*, 39*, 41*, 83-93* kDa                       | 2 of the following bands are present (+): 23-25*, 39*, and 41* kDa          |
| <b>Indeterminate</b> | When only bands 31* and 41* kDa or only 31* and 83-93* are present, test 488 is recommended for confirmation | N/A                                                                         |
| <b>Negative</b>      | If only 41* and 93* kDa are present. Does not meet IGX criteria for a positive or indeterminate test result. | Does not meet CDC/NYS criteria for a positive or indeterminate test result. |

**Limitation:** Bands 31\* and 34\* kDa are present in Lyme vaccinated patients. Viral antibodies cross react with antigens present at band positions 31\* and 83-93\* kDa.

Diagnosis should not be based on laboratory results alone. Results should be interpreted in conjunction with clinical symptoms and patient history.  
 NOTE: Western Blots, ImmunoBlots, Lyme Dot Blot, Epitope, PCR, IFA, FISH, C. pneumoniae IgG/IgA, CD57, IGXSpot, Broad Coverage Antibody, COVID-19 Test - These tests were developed and their performance characteristics determined by IGeneX, Inc. They have not been cleared or approved by the FDA. The FDA has determined that such approval is not necessary. These tests are used for clinical purposes and should not be regarded as investigational or for research. IGeneX, Inc. is licensed by CMS and NYS to perform high complexity clinical laboratory testing.

Collected:  
 Received:  
 Reported:  
 Reprinted:  
 Amended:  
 Corrected:

| TEST | SPECIMEN | RESULT | REFERENCE RANGE | UNITS |
|------|----------|--------|-----------------|-------|
|------|----------|--------|-----------------|-------|

Lyme Western Blot IgG                      Serum  
 IGX Criteria:                                      **Positive**  
 CDC/NYS Criteria:                              **Negative**

| Band (kDa) | 18 | 23-25* | 28 | 30 | 31* | 34* | 39* | 41* | 45 | 58 | 66 | 83-93* |
|------------|----|--------|----|----|-----|-----|-----|-----|----|----|----|--------|
| Intensity  | -  | -      | +  | -  | -   | ++  | -   | +   | -  | -  | -  | -      |

Band Intensity: Positive: + to +++, Indeterminate: Ind, Negative: (-)

| INTERPRETATION       | IGX CRITERIA                                                                           | CDC/NYS CRITERIA                                                                                       |
|----------------------|----------------------------------------------------------------------------------------|--------------------------------------------------------------------------------------------------------|
| <b>Positive</b>      | 2 or more of the starred bands are present (+): 23-25*, 31*, 34*, 39*, 41*, 83-93* kDa | 5 or more of the following bands are present (+): 18, 23-25*, 28, 30, 39*, 41*, 45, 58, 66, 83-93* kDa |
| <b>Indeterminate</b> | Only bands 31* and 41* kDa are present, test 489 is recommended for confirmation       | N/A                                                                                                    |
| <b>Negative</b>      | Does not meet IGX criteria for a positive or indeterminate test result.                | Does not meet CDC/NYS criteria for a positive or indeterminate test result.                            |

**Limitation:** Bands 31\* and 34\* kDa are present in Lyme vaccinated patients. Viral antibodies cross react with antigens present at band positions 31\* and 83-93\* kDa.

**BABESIOSIS**

| TEST                 | SPECIMEN | RESULT | REFERENCE RANGE                                                                                         | UNITS |
|----------------------|----------|--------|---------------------------------------------------------------------------------------------------------|-------|
| B. microti IFA - IgM | Serum    | <20    | < 20 : Negative<br>= 20 : May or may not indicate active infection<br>>=40 : Indicates active infection | Titer |

Diagnosis should not be based on laboratory results alone. Results should be interpreted in conjunction with clinical symptoms and patient history.  
 NOTE: Western Blots, ImmunoBlots, Lyme Dot Blot, Epitope, PCR, IFA, FISH, C. pneumoniae IgG/IgA, CD57, IGXSpot, Broad Coverage Antibody, COVID-19 Test - These tests were developed and their performance characteristics determined by iGeneX, Inc. They have not been cleared or approved by the FDA. The FDA has determined that such approval is not necessary. These tests are used for clinical purposes and should not be regarded as investigational or for research. iGeneX, Inc. is licensed by CMS and NYS to perform high complexity clinical laboratory testing.

Collected:  
 Received:  
 Reported:  
 Reprinted:  
 Amended:  
 Corrected:

| TEST                       | SPECIMEN | RESULT   | REFERENCE RANGE                                                                                          | UNITS |
|----------------------------|----------|----------|----------------------------------------------------------------------------------------------------------|-------|
| B. microti IFA - IgG       | Serum    | <40      | < 40 : Negative<br>< 160 : May or may not suggest active infection<br>>=160 : Indicates active infection | Titer |
| Babesia FISH               | W blood  | Negative |                                                                                                          |       |
| B. duncani IFA - IgM       | Serum    | <20      | < 20 : Negative<br>= 20 : May or may not indicate active infection<br>>=40 : Indicates active infection  | Titer |
| B. duncani IFA - IgG       | Serum    | <40      | < 40 : Negative<br>< 160 : May or may not suggest active infection<br>>=160 : Indicates active infection | Titer |
| <b><u>EHRlichiosis</u></b> |          |          |                                                                                                          |       |
| HME IFA - IgM              | Serum    | <20      | < 20 : Negative<br>= 20 : May or may not indicate active infection<br>>=40 : Indicates active infection  | Titer |
| HME IFA - IgG              | Serum    | <40      | < 40 : Negative<br>< 160 : May or may not suggest active infection<br>>=160 : Indicates active infection | Titer |

**ANAPLASMOSIS**

Diagnosis should not be based on laboratory results alone. Results should be interpreted in conjunction with clinical symptoms and patient history.

NOTE: Western Blots, ImmunoBlots, Lyme Dot Blot, Epitope, PCR, IFA, FISH, C. pneumoniae IgG/IgA, CD57, IGXSpot, Broad Coverage Antibody, COVID-19 Test - These tests were developed and their performance characteristics determined by iGeneX, Inc. They have not been cleared or approved by the FDA. The FDA has determined that such approval is not necessary. These tests are used for clinical purposes and should not be regarded as investigational or for research. iGeneX, Inc. is licensed by CMS and NYS to perform high complexity clinical laboratory testing.



Collected:  
 Received:  
 Reported:  
 Reprinted:  
 Amended:  
 Corrected:

| TEST                        | SPECIMEN | RESULT | REFERENCE RANGE                                                                                          | UNITS |
|-----------------------------|----------|--------|----------------------------------------------------------------------------------------------------------|-------|
| HGA IFA - IgM               | Serum    | <20    | < 20 : Negative<br>= 20 : May or may not indicate active infection<br>>=40 : Indicates active infection  | Titer |
| HGA IFA - IgG               | Serum    | <40    | < 40 : Negative<br>< 160 : May or may not suggest active infection<br>>=160 : Indicates active infection | Titer |
| <b><u>RICKETTSIOSIS</u></b> |          |        |                                                                                                          |       |
| R. rickettsii IFA - IgG     | Serum    | <40    | < 40 : Negative<br>< 160 : May or may not suggest active infection<br>>=160 : Indicates active infection | Titer |
| R. typhi IFA - IgG          | Serum    | <40    | < 40 : Negative<br>< 160 : May or may not suggest active infection<br>>=160 : Indicates active infection | Titer |

**End of Report**

Diagnosis should not be based on laboratory results alone. Results should be interpreted in conjunction with clinical symptoms and patient history.

NOTE: Western Blots, ImmunoBlots, Lyme Dot Blot, Epitope, PCR, IFA, FISH, C, pneumonise IgG/IgA, CD57, IGXSpot, Broad Coverage Antibody, COVID-19 Test - These tests were developed and their performance characteristics determined by iGeneX, Inc. They have not been cleared or approved by the FDA. The FDA has determined that such approval is not necessary. These tests are used for clinical purposes and should not be regarded as investigational or for research. iGeneX, Inc. is licensed by CMS and NYS to perform high complexity clinical laboratory testing.

**Figure S1.** A comprehensive list of the patient's blood test results, including antibody titers.

## Supplemental Tables

**Table S1.** Pro-dopamine regulation pre- and post-behavioral symptoms (Likert Scale 1 - 10). Stopped at week 30 and subsequently began antibacterial therapy.

| Days         | Depression | Suicide Ideation | Mania | OCD | ADD | Sydenham's Chorea | Anxiety | Agoraphobic | Insomnia | Pain | Body Dysmorphic Disorder | Lethargic | PTSD | Focus |
|--------------|------------|------------------|-------|-----|-----|-------------------|---------|-------------|----------|------|--------------------------|-----------|------|-------|
| Pre-baseline | 10         | 10               | 10    | 10  | 7   | 7                 | 10      | 10          | 9        | 8    | 9                        | 10        | 10   | 8     |
| 1            | 7          | 3                | 7     | 6   | 4   | 4                 | 7       | 6           | 5        | 8    | 5                        | 6         | 6    | 4     |
| 2            | 7          | 3                | 7     | 5   | 4   | 4                 | 7       | 6           | 6        | 8    | 4                        | 6         | 6    | 4     |
| 3            | 7          | 2                | 7     | 6   | 3   | 3                 | 7       | 5           | 4        | 8    | 4                        | 5         | 5    | 4     |
| 4            | 7          | 2                | 7     | 6   | 3   | 3                 | 7       | 5           | 4        | 8    | 4                        | 5         | 5    | 4     |
| 5            | 7          | 2                | 7     | 6   | 3   | 3                 | 7       | 5           | 4        | 8    | 4                        | 5         | 5    | 4     |
| 6            | 7          | 2                | 7     | 6   | 3   | 3                 | 7       | 5           | 4        | 8    | 4                        | 5         | 5    | 4     |
| 2            | 7          | 2                | 7     | 6   | 3   | 3                 | 7       | 5           | 4        | 8    | 4                        | 5         | 5    | 4     |
| 3            | 7          | 2                | 7     | 6   | 3   | 3                 | 7       | 5           | 4        | 8    | 4                        | 5         | 5    | 4     |
| 4            | 7          | 2                | 7     | 6   | 3   | 3                 | 7       | 5           | 4        | 8    | 4                        | 5         | 5    | 4     |
| 5            | 7          | 2                | 7     | 6   | 3   | 3                 | 7       | 5           | 4        | 8    | 4                        | 5         | 5    | 4     |
| 6            | 7          | 2                | 7     | 6   | 3   | 3                 | 7       | 5           | 4        | 8    | 4                        | 5         | 5    | 4     |
| 7            | 7          | 2                | 7     | 6   | 3   | 3                 | 7       | 5           | 4        | 8    | 4                        | 5         | 5    | 4     |
| 14           | 7          | 2                | 7     | 6   | 3   | 3                 | 7       | 5           | 4        | 8    | 4                        | 5         | 5    | 4     |
| 30           | 7          | 2                | 7     | 6   | 3   | 3                 | 7       | 5           | 4        | 8    | 4                        | 5         | 5    | 4     |
| 44           | 7          | 2                | 7     | 6   | 3   | 3                 | 7       | 5           | 4        | 8    | 4                        | 5         | 5    | 4     |
| 60           | 7          | 2                | 7     | 6   | 3   | 3                 | 7       | 5           | 4        | 8    | 4                        | 5         | 5    | 4     |
| 74           | 7          | 2                | 7     | 6   | 3   | 3                 | 7       | 5           | 4        | 8    | 4                        | 5         | 5    | 4     |
| 88           | 7          | 2                | 7     | 6   | 3   | 3                 | 7       | 5           | 4        | 8    | 4                        | 5         | 5    | 4     |
| 102          | 7          | 2                | 7     | 6   | 3   | 3                 | 7       | 5           | 4        | 8    | 4                        | 5         | 5    | 4     |

**Table S2.** Antibacterial pre- and post-behavioral symptoms (Likert Scale 1 - 10). The antibacterial therapy that was tolerated by the patient and prescribed by the attending physician throughout the entire treatment course included Augmentin 875 - 125 mg BID, Bactrim 800 - 160 mg BID, Doxycycline 100 mg BID, and Cefdinir 300 mg BID.

| Days         | Depression | Suicide Ideation | Mania | OCD | ODD | Sydenham's Chorea | Anxiety | Agoraphobic | Insomnia | Pain | Body Dysmorphic Disorder | Lethargic | PTSD | Focus |
|--------------|------------|------------------|-------|-----|-----|-------------------|---------|-------------|----------|------|--------------------------|-----------|------|-------|
| Pre-baseline | 7          | 2                | 7     | 6   | 3   | 3                 | 7       | 5           | 4        | 8    | 4                        | 5         | 5    | 4     |
| 1            | 5          | 1                | 4     | 3   | 2   | 2                 | 5       | 3           | 2        | 6    | 3                        | 3         | 3    | 2     |
| 2            | 5          | 1                | 4     | 3   | 2   | 2                 | 5       | 3           | 2        | 6    | 3                        | 3         | 3    | 2     |

**Continued**

---

|    |   |   |   |   |   |   |   |   |   |   |   |   |   |   |
|----|---|---|---|---|---|---|---|---|---|---|---|---|---|---|
| 3  | 5 | 1 | 4 | 3 | 2 | 2 | 5 | 3 | 2 | 6 | 3 | 3 | 3 | 2 |
| 4  | 4 | 1 | 4 | 3 | 2 | 2 | 4 | 3 | 2 | 6 | 3 | 3 | 3 | 2 |
| 5  | 4 | 1 | 2 | 2 | 2 | 1 | 4 | 2 | 1 | 3 | 2 | 2 | 2 | 2 |
| 6  | 4 | 1 | 2 | 2 | 2 | 1 | 4 | 2 | 1 | 3 | 2 | 2 | 2 | 2 |
| 7  | 4 | 1 | 2 | 2 | 2 | 1 | 4 | 2 | 1 | 3 | 2 | 2 | 2 | 2 |
| 14 | 4 | 1 | 2 | 2 | 2 | 1 | 4 | 2 | 1 | 3 | 2 | 2 | 2 | 2 |
| 30 | 4 | 1 | 2 | 2 | 2 | 1 | 4 | 2 | 1 | 3 | 2 | 2 | 2 | 2 |
| 44 | 4 | 1 | 2 | 2 | 2 | 1 | 4 | 2 | 1 | 3 | 2 | 2 | 2 | 2 |
| 60 | 4 | 1 | 2 | 2 | 2 | 1 | 4 | 2 | 1 | 3 | 2 | 2 | 2 | 2 |
| 74 | 3 | 1 | 2 | 2 | 2 | 1 | 3 | 2 | 1 | 2 | 2 | 2 | 2 | 2 |

---
